# Supplementary material
Source: Springer Nature journal article supplement (https://www.springermedizin.de/resource/supplementary/12936_2007_488_MOESM2_ESM.pdf/9547806)

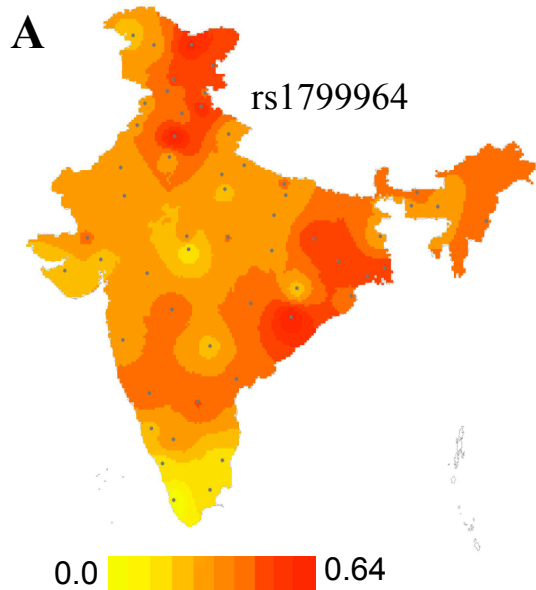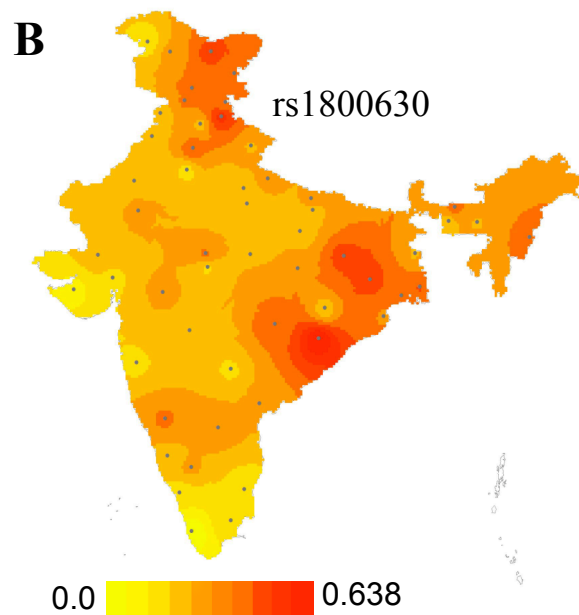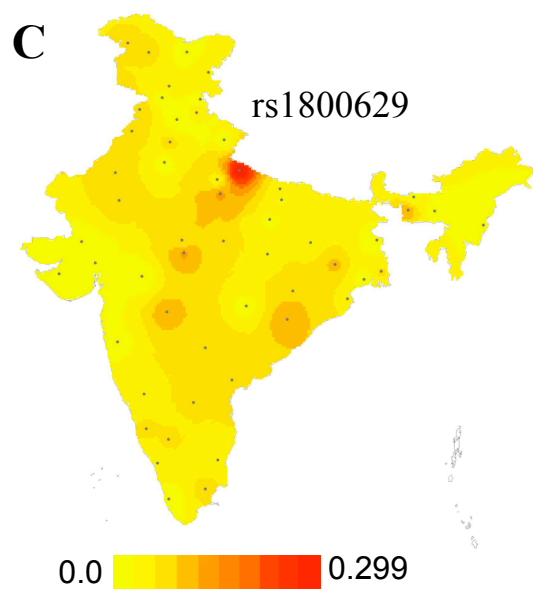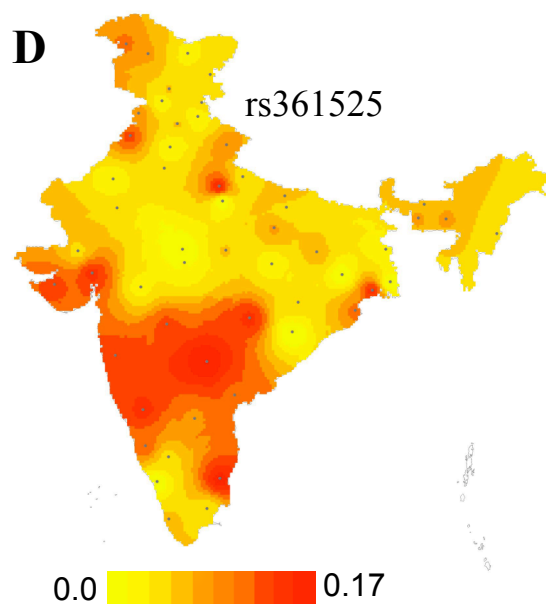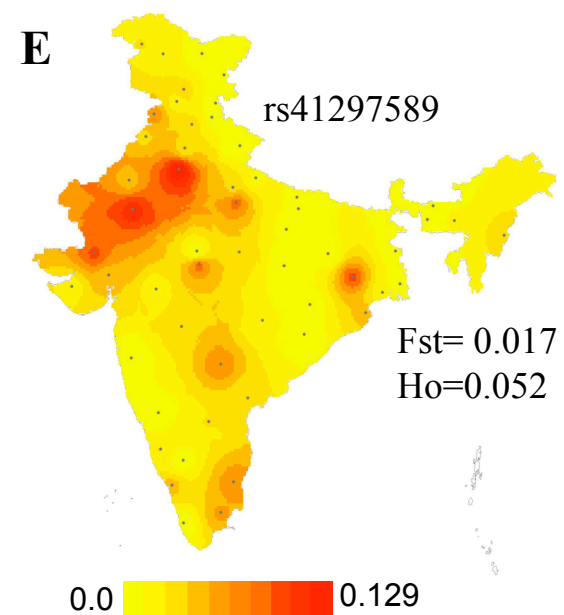

Supplement: MOESM2 [file 9547806]
